# Supplementary material
Source: PubMed Central journal article supplement (PMC3336864)
Supplement: NIHMS363865-supplement-1_si_001.pdf [file NIHMS363865-supplement-1_si_001.pdf]

# Multiple determinants for selective inhibition of apicomplexan calcium-dependent protein kinase CDPK1 - Supporting Information

Eric T. Larson,<sup>†,||</sup> Kayode K. Ojo,<sup>‡</sup> Ryan C. Murphy,<sup>¶</sup> Steven M. Johnson,<sup>¶</sup>  
Zhongsheng Zhang,<sup>†</sup> Jessica E. Kim,<sup>†</sup> David J. Leibly,<sup>‡</sup> Anna M. W. Fox,<sup>‡</sup> Molly C.  
Reid,<sup>‡</sup> Edward J. Dale,<sup>¶</sup> B. Gayani K. Perera,<sup>¶</sup> Jae Kim,<sup>†</sup> Stephen N. Hewitt,<sup>¶</sup> Wim  
G. J. Hol,<sup>†</sup> Christophe L. M. J. Verlinde,<sup>†</sup> Erkang Fan,<sup>†</sup> Wesley C. Van Voorhis,<sup>\*,‡</sup>  
Dustin J. Maly,<sup>\*,¶</sup> and Ethan A. Merritt<sup>\*,†</sup>

*Department of Biochemistry, Department of Medicine, Department of Chemistry, and University  
of Washington, Seattle, WA, USA*

E-mail: wesley@u.washington.edu; maly@chem.washington.edu; merritt@u.washington.edu

Table S1: Crystallographic data collection and refinement statistics for TgCDPK1 complexes

Table S2: Crystallographic data collection and refinement statistics for c-SRC complexes

Table S3: *In vitro* activity for additional compounds shown in Figure 1d

Figure S1: Difference electron density for inhibitors in TgCDPK1:inhibitor complexes

Figure S2: Difference electron density for inhibitors in SRC:inhibitor complexes

Experimental: Synthesis of compounds **8**, **9**, and **10**

References

---

\*To whom correspondence should be addressed

<sup>†</sup>Department of Biochemistry

<sup>‡</sup>Department of Medicine

<sup>¶</sup>Department of Chemistry

<sup>§</sup>University of Washington, Seattle, WA, USA

<sup>||</sup>Current address: Department of Medicinal Chemistry, Boehringer Ingelheim, Ridgefield, CT, USA

Table S1: Crystallographic data collection and refinement statistics for TgCDPK1 complexes.

|                                   | <b>2a</b>           | <b>3a</b>           | <b>2b</b>           |
|-----------------------------------|---------------------|---------------------|---------------------|
| <b>Data collection</b>            |                     |                     |                     |
| Space Group                       | $P2_1$              | $P2_1$              | $P2_1$              |
| a, b, c (Å)                       | 47.97, 71.93, 66.62 | 47.45, 72.24, 65.82 | 47.63, 72.66, 66.10 |
| $\alpha, \beta, \gamma$ (°)       | 90., 103.47, 90.    | 90., 99.18, 90.     | 90., 99.04, 90.     |
| Wavelength (Å)                    | 0.9762              | 0.9762              | 0.9795              |
| Resolution (Å)                    | 50-2.04 (2.11-2.04) | 50-2.04 (2.09-2.04) | 60-2.10 (2.16-2.10) |
| Unique reflections                | 28208               | 28166               | 26082               |
| $R_{merge}$                       | 0.076 (0.732)       | 0.064 (0.695)       | 0.095 (0.887)       |
| mean $I/\sigma(I)$                | 17.45(1.7)          | 21.5 (1.9)          | 14.4 (1.5)          |
| Completeness (%)                  | 99.9 (99.9)         | 99.8 (98.9)         | 99.9 (99.4)         |
| Redundancy                        | 3.7 (3.7)           | 3.8 ( 3.7)          | 3.8 (3.8)           |
| Wilson B factor (Å <sup>2</sup> ) | 31                  | 35                  | 32                  |
| <b>Refinement</b>                 |                     |                     |                     |
| Resolution (Å)                    | 39-2.04             | 39-2.04             | 39-2.10             |
| Reflections                       | 28140               | 28099               | 26055               |
| Reflections (test set)            | 1470                | 1432                | 1328                |
| $R_{work}/R_{free}$               | 0.197/0.240         | 0.201/0.234         | 0.194/0.237         |
| No. atoms                         |                     |                     |                     |
| Protein                           | 3632                | 3614                | 3629                |
| Ligand                            | 29                  | 34                  | 45                  |
| Water                             | 96                  | 76                  | 111                 |
| TLS groups                        | 6                   | 5                   | 7                   |
| mean $B_{eq}$ (Å <sup>2</sup> )   | 41                  | 51                  | 42                  |
| R.m.s. non-ideality               |                     |                     |                     |
| Bond lengths (Å)                  | 0.008               | 0.006               | 0.010               |
| Bond angles (°)                   | 0.966               | 0.850               | 1.078               |
| PDB entry                         | 3t3v                | 3sxf                | 3t3u                |

Table S1 (cont): Crystallographic data collection and refinement statistics for TgCDPK1 complexes.

|                                   | <b>3b</b>           | <b>7b</b>           | <b>10</b>           |
|-----------------------------------|---------------------|---------------------|---------------------|
| <b>Data collection</b>            |                     |                     |                     |
| Space Group                       | $P2_1$              | $P2_1$              | $P2_1$              |
| a, b, c (Å)                       | 48.28, 72.48, 67.27 | 48.27, 72.79, 67.29 | 48.29, 72.93, 66.92 |
| $\alpha, \beta, \gamma$ (°)       | 90, 103.81, 90.     | 90., 103.49, 90.    | 90., 101.02, 90.    |
| Wavelength (Å)                    | 0.9795              | 0.9795              | 0.9795              |
| Resolution (Å)                    | 47-2.65 (2.71-2.64) | 37-2.20(2.32-2.20)  | 36-2.27 (2.39-2.27) |
| Unique reflections                | 13349               | 22898               | 20869               |
| $R_{merge}$                       | 0.145 (0.857)       | 0.084 (0.498)       | 0.089 (0.615)       |
| mean $I/\sigma(I)$                | 9.8 (1.5)           | 9.5 (2.3)           | 6.9 (1.9)           |
| Completeness (%)                  | 99.5 (92.6)         | 99.1 (93.6)         | 98.6 (98.1)         |
| Redundancy                        | 3.8 (3.7)           | 4.0 (3.7)           | 4.1 (4.1)           |
| Wilson B factor (Å <sup>2</sup> ) | 50                  | 33                  | 40                  |
| <b>Refinement</b>                 |                     |                     |                     |
| Resolution (Å)                    | 47-2.65             | 37-2.20             | 37-2.27             |
| Reflections                       | 13331               | 21708               | 19795               |
| Reflections (test set)            | 677                 | 1171                | 1073                |
| $R_{work}/R_{free}$               | 0.197/0.244         | 0.191/0.251         | 0.204/0.264         |
| No. atoms                         |                     |                     |                     |
| Protein                           | 3664                | 3698                | 3528                |
| Ligand                            | 30                  | 17                  | 25                  |
| Water                             | 26                  | 65                  | 36                  |
| TLS groups                        | 0                   | 7                   | 6                   |
| mean $B_{eq}$ (Å <sup>2</sup> )   | 45                  | 46                  | 43                  |
| R.m.s. non-ideality               |                     |                     |                     |
| Bond lengths (Å)                  | 0.007               | 0.005               | 0.007               |
| Bond angles (°)                   | 0.907               | 0.890               | 1.093               |
| PDB entry                         | 3sx9                | 3upz                | 3upy                |

Table S2: Crystallographic data collection and refinement statistics for c-SRC complexes.

|                                   | <b>3a</b>           | <b>7b</b>           |
|-----------------------------------|---------------------|---------------------|
| <b>Data collection</b>            |                     |                     |
| Space Group                       | <i>P1</i>           | <i>P1</i>           |
| a, b, c (Å)                       | 41.79, 63.24, 73.30 | 42.54, 63.72, 74.98 |
| $\alpha, \beta, \gamma$ (°)       | 79.32, 89.35, 89.88 | 78.17, 89.34, 90.08 |
| Wavelength (Å)                    | 0.9795              | 0.9795              |
| Resolution (Å)                    | 41-2.27 (2.39-2.27) | 62-2.20 (2.32-2.20) |
| Unique reflections                | 32963 (4766)        | 38121 (5485)        |
| $R_{merge}$                       | 0.101 (0.666)       | 0.114 (0.893)       |
| mean $I/\sigma(I)$                | 8.3 (2.0)           | 7.2 (1.3)           |
| Completeness (%)                  | 96.8 (95.7)         | 97.5 (96.7)         |
| Redundancy                        | 3.9 (3.9)           | 4.0 (4.0)           |
| Wilson B factor (Å <sup>2</sup> ) | 38                  | 36                  |
| <b>Refinement</b>                 |                     |                     |
| Resolution (Å)                    | 36-2.27             | 53-2.20             |
| Reflections                       | 31291               | 36215               |
| Reflections (test set)            | 1672                | 1905                |
| $R_{work}/R_{free}$               | 0.227/0.256         | 0.229/0.259         |
| No. atoms                         |                     |                     |
| Protein                           | 4058                | 4132                |
| Ligand                            | 52                  | 34                  |
| Water                             | 70                  | 28                  |
| TLS groups                        | 5 per chain         | 1 per chain         |
| mean $B_{eq}$ (Å <sup>2</sup> )   | 35                  | 56                  |
| R.m.s. non-ideality               |                     |                     |
| Bond lengths (Å)                  | 0.008               | 0.009               |
| Bond angles (°)                   | 1.194               | 1.231               |
| PDB entry                         | 3uqf                | 3uqg                |

Table S3: *In vitro* activity for additional compounds shown in Figure 1d

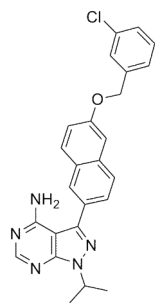

**11**

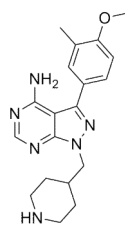

**12**

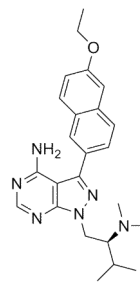

**13**

TgCDPK1  $K_i$ ( $\mu$ M)

0.0028

0.0011

0.006

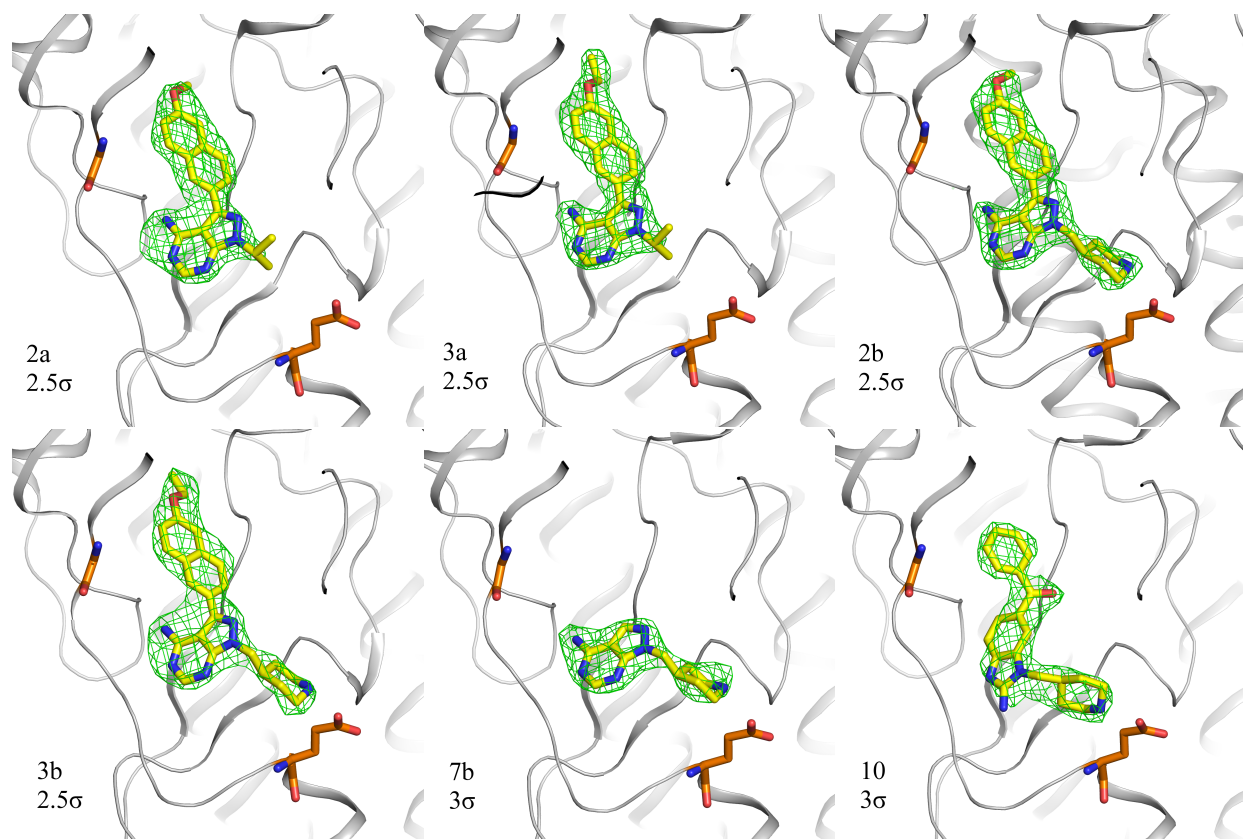

Figure S1: Difference electron density for inhibitors in *TgCDPK1*:inhibitor complexes. In each case the density contours are from an  $(mF_{obs} - F_{calc})$  Fourier synthesis after refinement of the model with no inhibitor atoms contributing to  $F_{calc}$ .

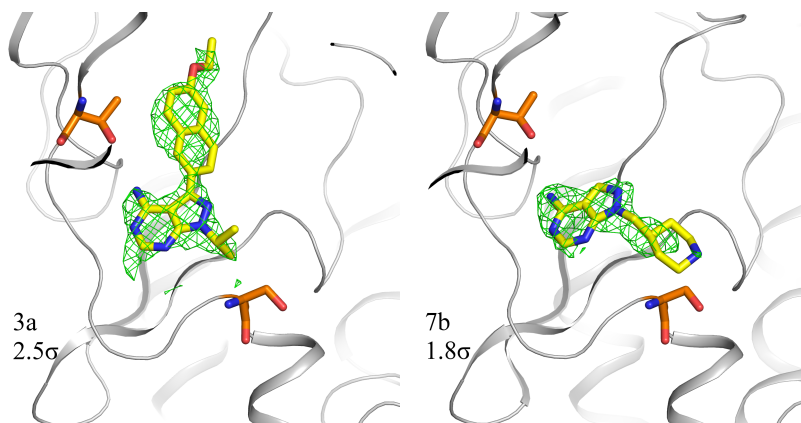

Figure S2: Difference electron density for inhibitors in SRC:inhibitor complexes. In each case the density contours are from an  $(mF_{obs} - F_{calc})$  Fourier synthesis after refinement of the model with no inhibitor atoms contributing to  $F_{calc}$ .

## Experimental

Compound **8** was purchased from SigmaAldrich. Compound **9** was synthesized according to the literature.<sup>1</sup> <sup>1</sup>H NMR (500 MHz, DMSO)  $\delta$  7.64 (d,  $J = 5.7$  Hz, 2H), 7.61 – 7.54 (m, 1H), 7.54 – 7.46 (m, 3H), 7.36 (dd,  $J = 8.2, 1.6$  Hz, 1H), 7.15 (d,  $J = 8.2$  Hz, 1H), 6.60 (s, 2H). MS (ESI) 238.3  $m/z$  [ $MH^+$ ]. Compound **10** was synthesized according to the literature by using (3-fluoro-4-nitrophenyl)(phenyl)methanone and tert-butyl 4-(aminomethyl)piperidine-1-carboxylate.<sup>2</sup> <sup>1</sup>H NMR (500 MHz, MeOD)  $\delta$  7.98 (s, 1H), 7.79 (d,  $J = 7.1$  Hz, 2H), 7.77 – 7.72 (m, 1H), 7.68 (t,  $J = 7.3$  Hz, 1H), 7.61 – 7.50 (m, 3H), 4.20 (d,  $J = 9.4$  Hz, 2H), 3.44 (d,  $J = 12.6$  Hz, 2H), 2.98 (t,  $J = 11.1$  Hz, 2H), 2.40 – 2.26 (m, 1H), 1.95 (m, 2H), 1.67 (m, 2H). MS (ESI) 335.4  $m/z$  [ $MH^+$ ].

## References

- (1) Ohemeng, K. A.; Roth, B. Receptor-based design of novel dihydrofolate reductase inhibitors: benzimidazole and indole derivatives. *J. Med. Chem.* **1991**, *34*, 1383–1394.
- (2) McGuinness, B. F.; Cole, A. G.; Dong, G.; Brescia, M. R.; Shao, Y.; Henderson, I.; Rokosz, L. L.; Stauffer, T. M.; Mannava, N.; Kimble, E. F.; Hicks, C.; White, N.; Wines, P. G.; Quadros, E. Discovery of 2-aminoimidazopyridine adenosine A(2A) receptor antagonists. *Bioorg. Med. Chem. Lett.* **2010**, *20*, 6845–6849.
